# Supplementary material for: Green liquid marble-based hydrogels as pesticidal pyrethrin slow-release carriers
Source: Royal Society of Chemistry journal article supplement (doi:10.1039/d3gc03625a), 2024-01-01
Supplement: d3gc03625a5.pdf [file d3gc03625a5.pdf]

## Electronic Supplementary Information

# Green liquid marble-based hydrogels as pesticidal pyrethroid slow-release carriers

*Qin Li,<sup>a, 1</sup> Changhong Wang,<sup>a, 1</sup> Jiayuan He,<sup>a</sup> Dandan Yang,<sup>a</sup> Ting Li,<sup>a</sup> Huixian Xu,<sup>a</sup>*

*Weifeng Shen,<sup>a</sup> Liandi Zhou,<sup>\*b</sup> Saimeng Jin,<sup>\*a</sup> Qihui Zhang<sup>\*a</sup> and James H. Clark<sup>c</sup>*

<sup>a</sup> School of Chemistry and Chemical Engineering, Chongqing University, Chongqing 400044, China;

<sup>b</sup> Chongqing College of Traditional Chinese Medicine, Chongqing 402760, China;

<sup>c</sup> Green Chemistry Centre of Excellence, University of York, York YO105D, U.K.

<sup>1</sup>Co-first author: These authors contributed equally to the article.

## **Contents**

|                             |    |
|-----------------------------|----|
| 1. Supporting Figures ..... | S1 |
| 2. Supporting Tables.....   | S8 |

## 1. Supporting Figures

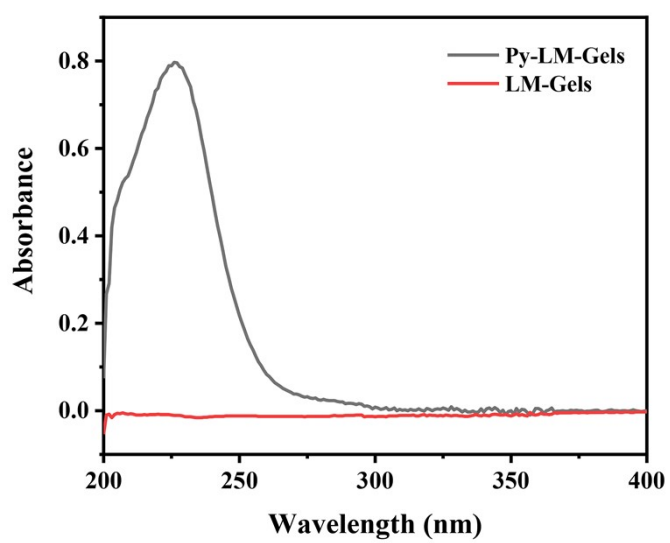

**Figure S1.** The UV spectroscopy scanning of LM-Gels and Py-LM-Gels.

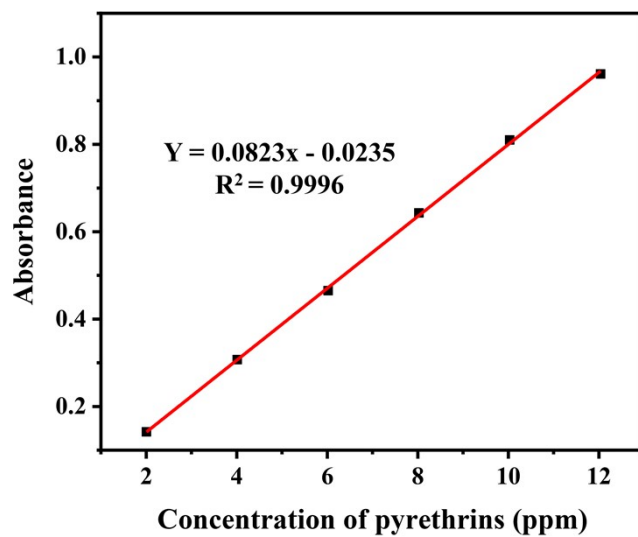

**Figure S2.** The standard curve of pyrethrin (Methanol as a solvent).

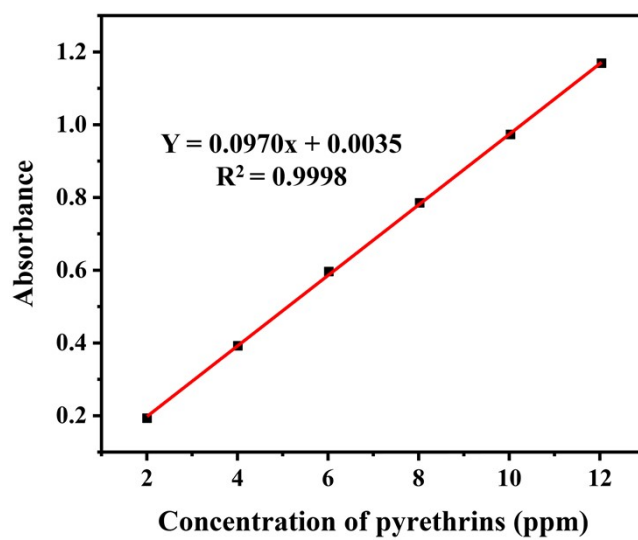

**Figure S3.** The standard curve of pyrethrin (Methanol-water as a solvent).

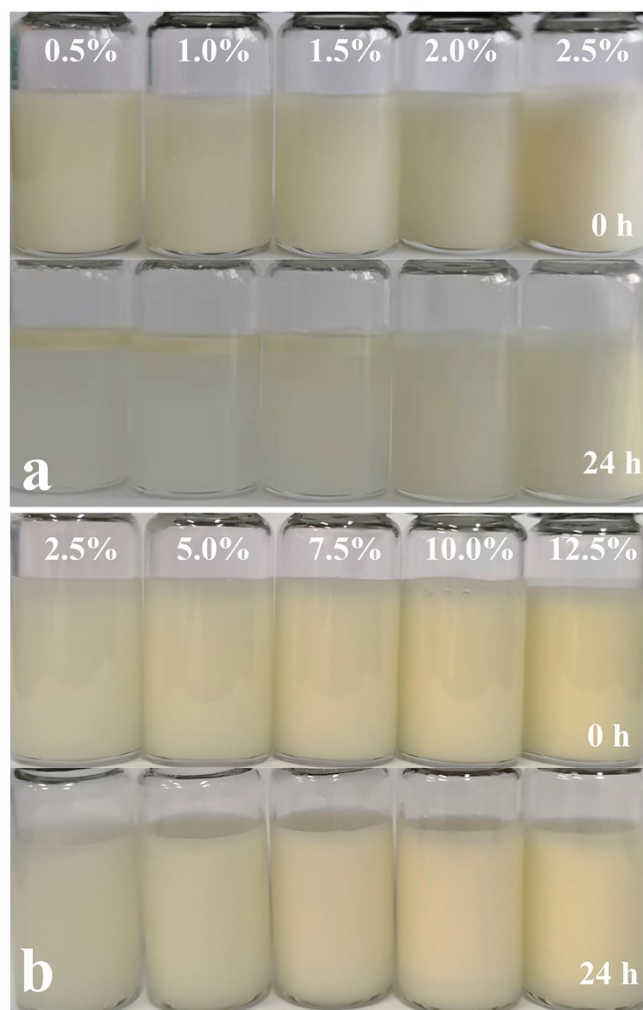

**Figure S4.** Photograph of the effect of the concentration of (a) SA-GE and (b) pyrethrin on the stability of pyrethrin before and after 24 h.

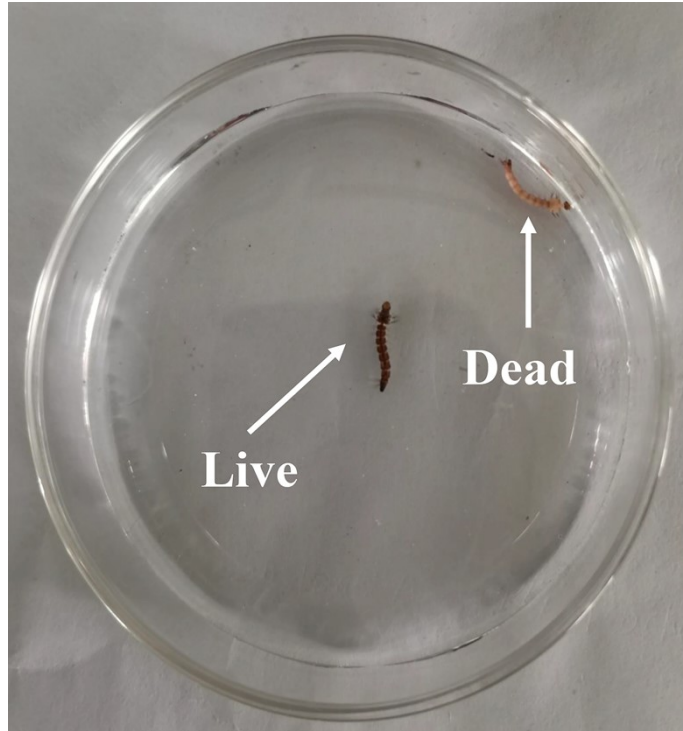

**Figure S5.** Photograph of the live and dead *aedes albopictus* larvae.

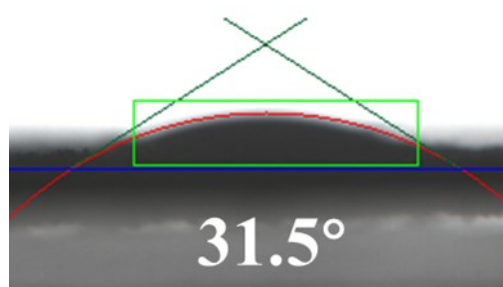

**Figure S6.** contact angle of silanized cellulose with formamide.



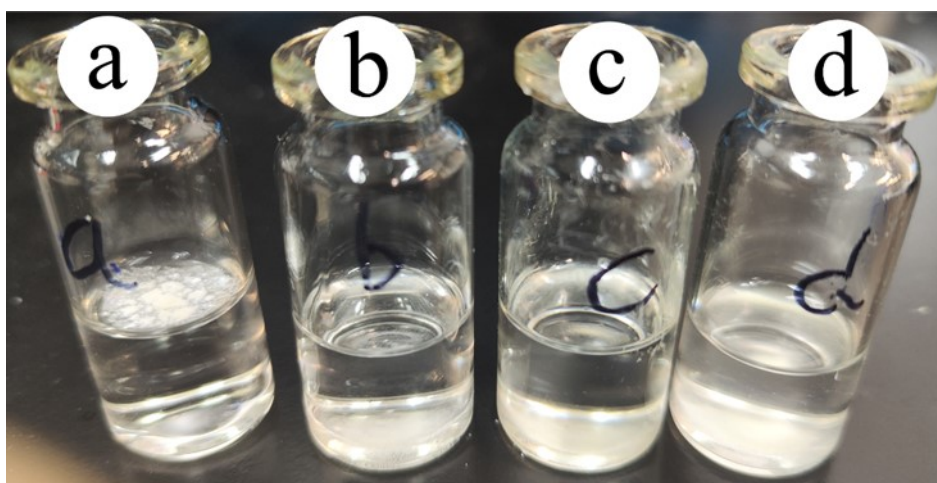

**Figure S7.** Dispersion of silanized cellulose in (a) water (b) ethanol (c) toluene (d) acetone.

## 2. Supporting Tables

**Table S1.** Optimization of modified cellulose.

| The concentration of Ethanol (wt%) | The volume of NaOH (mL) | The ratio of cellulose and VTES | Time (min) |
|------------------------------------|-------------------------|---------------------------------|------------|
| 40                                 | 6                       | 1:3                             | 60         |
| 40                                 | 9                       | 1:3                             | 60         |
| 40                                 | 12                      | 1:3                             | 60         |
| 40                                 | 15                      | 1:3                             | 60         |
| 40                                 | 18                      | 1:3                             | 60         |
| 40                                 | 9                       | 1:3                             | 30         |
| 40                                 | 9                       | 1:3                             | 60         |
| 40                                 | 9                       | 1:3                             | 90         |
| 40                                 | 9                       | 1:3                             | 120        |
| 40                                 | 9                       | 1:3                             | 150        |
| 40                                 | 9                       | 1:1                             | 90         |
| 40                                 | 9                       | 1:2                             | 90         |
| 40                                 | 9                       | 1:3                             | 90         |
| 40                                 | 9                       | 1:4                             | 90         |
| 40                                 | 9                       | 1:5                             | 90         |
| 40                                 | 9                       | 1:1                             | 90         |
| 60                                 | 9                       | 1:1                             | 90         |
| 80                                 | 9                       | 1:1                             | 90         |
| 100                                | 9                       | 1:1                             | 90         |

**Table S2.** The influence of the concentration of SA-GE and pyrethrin on the emulsion stability.

| The concentration of SA-GE (%) | The concentration of pyrethrins (%) | Stability time (h) |
|--------------------------------|-------------------------------------|--------------------|
| 0.50                           | 2.5                                 | 8                  |
| 1.00                           | 2.5                                 | 16                 |
| 1.50                           | 2.5                                 | 18                 |
| 2.00                           | 2.5                                 | >24                |
| 2.50                           | 2.5                                 | >24                |
| 2.50                           | 2.5                                 | >24                |
| 2.00                           | 5.0                                 | >24                |
| 2.00                           | 7.5                                 | >24                |
| 2.00                           | 10.0                                | >24                |
| 2.00                           | 12.5                                | >24                |

**Table S3.** Kinetic parameters of of pyrethrin released from Py-LM-Gel in different conditions.

| Kinetic model | R <sup>2</sup>                 |        |        |             |        |
|---------------|--------------------------------|--------|--------|-------------|--------|
|               | The concentration of pyrethrin |        |        | Temperature |        |
|               | 2.5%                           | 5.0%   | 7.5%   | 20 °C       | 30 °C  |
| Zero-order    | 0.7026                         | 0.9435 | 0.6926 | 0.7630      | 0.6479 |
| First-order   | 0.9872                         | 0.9983 | 0.9731 | 0.9883      | 0.9809 |
| Higuchi       | 0.8743                         | 0.9866 | 0.9385 | 0.9718      | 0.8650 |
| Ritger-Peppas | 0.8723                         | 0.9813 | 0.9310 | 0.9091      | 0.8484 |
